# Supplementary material
Source: PubMed Central journal article supplement (PMC10538372)
Supplement: NIHMS1928411-supplement-Supplemental_figures.pdf [file NIHMS1928411-supplement-Supplemental_figures.pdf]

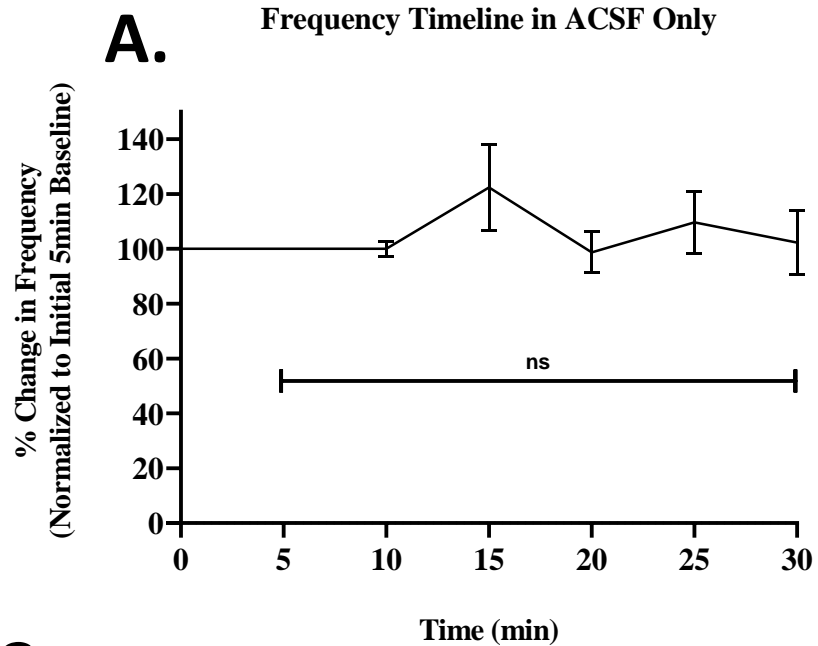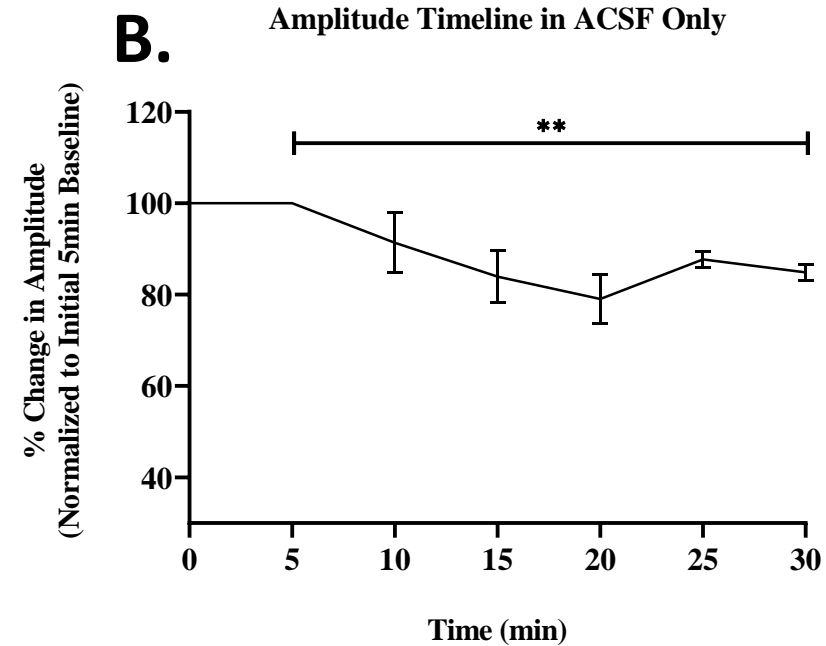

**C.**

| <u>AMPLITUDE</u>                        | 10nM Stressin | 100nM Stressin | 1 $\mu$ M Stressin | 1 $\mu$ M NBI | Mean Change (%) in sIPSC Amplitude in ACSF (25 min) |
|-----------------------------------------|---------------|----------------|--------------------|---------------|-----------------------------------------------------|
| Adolescent Males<br>( <i>n</i> = 8-10)  | -9.85 (18.63) | -10.07 (4.56)  | -5.27 (7.42)       | -15.93 (6.97) | -13.88 (3.58)                                       |
| Adolescent Females<br>( <i>n</i> = 8-9) | -4.95 (11.95) | -12.64 (3.94)  | -28.17 (7.21)      | -11.69 (4.18) |                                                     |
| Adult Males<br>( <i>n</i> = 7-8)        | -14.75 (1.12) | -12.94 (6.29)  | -29.28 (2.03)      | -17.33 (4.21) |                                                     |
| Adult Females<br>( <i>n</i> = 8)        | -3.68 (7.44)  | -25.67 (5.71)  | -9.68 (6.15)       | -17.21 (7.44) |                                                     |
